# Supplementary material
Source: publisher figshare collection journal article supplement (https://geolsoc.figshare.com/ndownloader/files/5425739)
Supplement: Supplementary file 1 [file 5425739]

Musayliq	Musayliq	Musayliq	Musayliq	Musayliq	Musayliq	Musayliq	Musayliq	Musayliq	Musayliq	Musayliq	Musayliq	Musayliq	Musayliq	Musayliq	Musayliq	Musayliq	Musayliq	Musayliq	Musayliq	Musayliq	Musayliq	Musayliq	Musayliq	Musayliq	Musayliq	Musayliq	Musayliq	Musayliq	Musayliq	Musayliq	Musayliq	Musayliq	Musayliq	Musayliq		average	S.D.(?)
	1	2	3	4	5	6	7	8	9	10	11	12	13	14	15	16	17	18	19	20	21	22	23	24	25	26	27	28	29	30	31	32	33	34
SiO2	0.00	0.00	0.00	0.00	0.00	0.04	0.00	0.00	0.00	0.00	0.00	0.00	0.00	0.00	0.00	0.00	0.00	0.00	0.00	0.00	0.00	0.00	0.00	0.00	0.00	0.00	0.00	0.00	0.00	0.00	0.00	0.00	0.00	0.00		0.00	0.01
TiO2	0.18	0.08	0.10	0.10	0.07	0.34	0.05	0.08	0.07	0.05	0.14	0.07	0.05	0.12	0.10	0.08	0.16	0.15	0.15	0.11	0.06	0.12	0.13	0.06	0.39	0.12	0.09	0.00	0.09	0.14	0.08	0.14	0.10	0.10		0.11	0.07
Al2O3	12.94	26.78	22.77	27.82	8.14	4.15	19.88	23.95	17.81	20.72	17.00	24.24	24.05	8.80	19.33	20.76	5.53	15.82	14.34	15.40	28.81	9.86	18.90	16.28	24.49	16.65	17.02	25.75	21.21	24.71	20.21	14.59	20.06	22.01		18.55	6.14
Cr2O3	53.33	43.24	47.11	39.93	60.72	53.57	48.32	44.45	50.62	44.58	48.66	43.73	44.24	53.71	48.07	47.04	56.52	51.97	52.77	52.75	40.57	43.41	48.29	51.42	41.27	51.20	48.71	43.19	45.91	43.33	46.24	53.76	47.38	45.97		48.12	4.77
FeO*	22.73	16.83	17.67	18.81	22.79	36.65	21.62	17.93	22.22	24.53	23.85	20.26	18.16	33.30	20.11	18.96	31.29	21.94	22.45	21.07	16.42	41.00	21.74	21.68	21.13	22.52	24.93	15.69	19.48	19.85	23.53	20.52	20.72	20.82		22.45	5.42
MnO	0.28	0.15	0.20	0.18	0.41	2.26	0.33	0.24	0.27	0.31	0.37	0.27	0.21	0.54	0.22	0.25	0.43	0.32	0.35	0.36	0.18	0.54	0.32	0.30	0.25	0.34	0.32	0.11	0.24	0.30	0.34	0.31	0.22	0.22		0.35	0.35
MgO	8.84	13.65	12.74	12.11	7.61	2.48	9.62	12.66	8.73	9.50	8.21	11.30	12.59	3.95	11.12	11.82	5.68	9.62	8.78	10.01	13.06	4.78	9.68	10.13	12.21	8.89	8.52	13.64	11.63	11.22	9.02	10.30	10.50	10.29		9.85	2.62
CaO	0.03	0.00	0.00	0.00	0.00	0.01	0.01	0.00	0.04	0.03	0.02	0.00	0.00	0.00	0.00	0.00	0.03	0.03	0.15	0.00	0.00	0.02	0.03	0.00	0.03	0.00	0.03	0.03	0.00	0.05	0.04	0.00	0.00	0.00		0.02	0.03
Na2O	0.02	0.04	0.02	0.04	0.03	0.06	0.09	0.02	0.06	0.07	0.04	0.09	0.03	0.06	0.06	0.03	0.04	0.06	0.07	0.02	0.03	0.01	0.06	0.00	0.05	0.05	0.06	0.04	0.03	0.03	0.04	0.04	0.03	0.02		0.04	0.02
K2O	0.04	0.02	0.02	0.02	0.04	0.05	0.02	0.02	0.03	0.04	0.03	0.03	0.03	0.04	0.03	0.02	0.02	0.02	0.04	0.04	0.01	0.02	0.01	0.03	0.02	0.03	0.02	0.03	0.02	0.01	0.03	0.04	0.04	0.04		0.03	0.01
P2O3	0.00	0.02	0.00	0.00	0.00	0.08	0.00	0.00	0.00	0.00	0.00	0.00	0.03	0.00	0.00	0.00	0.05	0.00	0.06	0.00	0.00	0.10	0.00	0.00	0.00	0.00	0.06	0.00	0.00	0.00	0.08	0.00	0.00	0.00		0.01	0.03
NiO	0.00	0.06	0.00	0.00	0.00	0.00	0.00	0.00	0.00	0.00	0.00	0.05	0.13	0.00	0.06	0.00	0.00	0.00	0.00	0.00	0.00	0.00	0.00	0.00	0.00	0.00	0.00	0.00	0.00	0.00	0.00	0.00	0.00	0.00		0.01	0.03
Total	98.38	100.87	100.64	99.01	99.81	99.71	99.94	99.34	99.85	99.83	98.31	100.03	99.52	100.51	99.11	98.96	99.75	99.92	99.15	99.76	99.15	99.85	99.15	99.90	99.83	99.79	99.76	98.47	98.61	99.64	99.62	99.69	99.06	99.48		99.54	0.59
Mg#	0.439	0.608	0.581	0.550	0.386	0.135	0.457	0.581	0.421	0.450	0.403	0.520	0.578	0.203	0.527	0.554	0.295	0.463	0.432	0.483	0.588	0.244	0.463	0.486	0.556	0.430	0.412	0.623	0.547	0.517	0.431	0.497	0.498	0.483		0.466	0.111
Cr#	0.734	0.520	0.581	0.491	0.833	0.897	0.620	0.555	0.656	0.591	0.658	0.548	0.552	0.804	0.625	0.603	0.873	0.688	0.712	0.697	0.486	0.747	0.632	0.679	0.531	0.674	0.658	0.529	0.592	0.541	0.605	0.712	0.613	0.583		0.642	0.103
Cr/(Cr+Al+Fe3+)	0.710	0.513	0.573	0.484	0.821	0.792	0.611	0.544	0.650	0.564	0.639	0.537	0.541	0.743	0.608	0.589	0.790	0.670	0.695	0.680	0.485	0.603	0.618	0.658	0.507	0.661	0.631	0.524	0.576	0.533	0.589	0.695	0.600	0.575		0.618	0.086
Al/(Cr+Al+Fe3+)	0.257	0.474	0.413	0.503	0.164	0.091	0.375	0.437	0.341	0.390	0.333	0.443	0.438	0.182	0.364	0.387	0.115	0.304	0.281	0.296	0.514	0.204	0.360	0.311	0.449	0.320	0.328	0.465	0.397	0.453	0.384	0.281	0.378	0.411		0.348	0.105
Fe3+/(Cr+Al+Fe3+)	0.033	0.013	0.015	0.014	0.015	0.117	0.015	0.019	0.010	0.046	0.028	0.020	0.021	0.075	0.028	0.024	0.094	0.026	0.024	0.024	0.001	0.193	0.021	0.031	0.044	0.018	0.041	0.011	0.027	0.013	0.027	0.024	0.022	0.014		0.034	0.036
	FeO*, total iron as FeO. Mg#, Mg/(Mg+Fe2+) atomic ratio. Cr#, Cr/(Cr+Al) atomic ratio.
